# Supplementary material for: Grapefruit seed extract effectively inhibits the Candida albicans biofilms development on polymethyl methacrylate denture-base resin
Source: PubMed Central journal article supplement (PMC6538181; doi:10.1371/journal.pone.0217496), 2019-05-28
Supplement: pone.0217496.s001.pdf [file pone.0217496.s001.pdf]

|         | control  | GSE0.1% | GSE1% | polident | GSE+polident |
|---------|----------|---------|-------|----------|--------------|
| 1       | 13600000 | 4000000 | 0     | 4410000  | 80000        |
| 2       | 14600000 | 3100000 | 0     | 2570000  | 210000       |
| 3       | 12700000 | 6800000 | 0     | 3730000  | 410000       |
| 4       | 14800000 | 5400000 | 0     | 5420000  | 1660000      |
| 5       | 10800000 | 1600000 | 0     | 2880000  | 500000       |
| 6       | 15500000 | 1400000 | 0     | 3380000  | 520000       |
| 7       | 8100000  | 5200000 | 0     | 3240000  | 1270000      |
| 8       | 11800000 | 4100000 | 4     | 2700000  | 1280000      |
| 9       | 12200000 | 3100000 | 340   | 2670000  | 30000        |
| 10      | 8200000  | 4800000 | 1010  | 4240000  | 50000        |
| 11      | 14300000 | 8360000 | 250   | 790000   | 130000       |
| 12      | 15800000 | 4480000 | 2390  | 260000   | 1790000      |
| 13      | 18300000 | 7740000 | 1290  | 1500000  | 1210000      |
| 14      | 9900000  | 4480000 | 0     | 2060000  | 2740000      |
| 15      | 12300000 | 8100000 | 0     | 2370000  | 3850000      |
| 16      | 10000000 | 7720000 | 0     | 10000    | 3110000      |
| 17      | 14600000 | 5460000 | 230   | 0        | 5100000      |
| 18      | 11500000 | 8080000 | 180   | 160000   | 4200000      |
| 19      | 12500000 | 6460000 | 170   | 860000   | 4740000      |
| 20      | 10400000 | 6780000 | 140   | 4950000  | 5240000      |
| average | 12595000 | 5358000 | 300.2 | 2410000  | 1906000      |
