# Supplementary material for: Grapefruit seed extract effectively inhibits the Candida albicans biofilms development on polymethyl methacrylate denture-base resin
Source: PubMed Central journal article supplement (PMC6538181; doi:10.1371/journal.pone.0217496), 2019-05-28
Supplement: pone.0217496.s002.pdf [file pone.0217496.s002.pdf]

|         | control  | GSE0.1%  | GSE1% | polident | G+P     |
|---------|----------|----------|-------|----------|---------|
| 1       | 19400000 | 8340000  | 0     | 8700000  | 4800000 |
| 2       | 13000000 | 5250000  | 0     | 6700000  | 5900000 |
| 3       | 11600000 | 11960000 | 0     | 7200000  | 3600000 |
| 4       | 19600000 | 3000000  | 0     | 6800000  | 2800000 |
| 5       | 11100000 | 6000000  | 0     | 9200000  | 2100000 |
| 6       | 11000000 | 8400000  | 0     | 15800000 | 4700000 |
| 7       | 14400000 | 5600000  | 0     | 11900000 | 4900000 |
| 8       | 23100000 | 12300000 | 0     | 12600000 | 3200000 |
| 9       | 32100000 | 3050000  | 0     | 11400000 | 1900000 |
| 10      | 19600000 | 6700000  | 630   | 14000000 | 2800000 |
| 11      | 21400000 | 4400000  | 10    | 4100000  | 7000000 |
| 12      | 20400000 | 3300000  | 60    | 10300000 | 5400000 |
| 13      | 13400000 | 4900000  | 40    | 8500000  | 4800000 |
| 14      | 19400000 | 7100000  | 0     | 5400000  | 9000000 |
| 15      | 14200000 | 3100000  | 0     | 10100000 | 7000000 |
| 16      | 27500000 | 5100000  | 0     | 13700000 | 4000000 |
| 17      | 25500000 | 3300000  | 0     | 12000000 | 6000000 |
| 18      | 24200000 | 3400000  | 0     | 10900000 | 4100000 |
| 19      | 24600000 | 8500000  | 0     | 11900000 | 2800000 |
| 20      | 25800000 | 5500000  | 0     | 14300000 | 6000000 |
| average | 19565000 | 5960000  | 37    | 10275000 | 4640000 |
